# Supplementary material for: A2Se2C2 (A = Na–Cs): crystalline compounds featuring −Se–C[triple bond, length as m-dash]C–Se− dianions with short-range structural disorder
Source: Royal Society of Chemistry journal article supplement (doi:10.1039/d6ra01467d), 2026-05-05
Supplement: d6ra01467d1.pdf [file d6ra01467d1.pdf]

# Supplementary Information

$A_2Se_2C_2$  (A = Na–Cs): Crystalline Compounds Featuring  $^-Se-C\equiv C-Se^-$   
Dianions with Short-Range Structural Disorder

T. Mattick, M. Hetzert, U. Ruschewitz

## Contents

|          |                                             |            |
|----------|---------------------------------------------|------------|
| <b>1</b> | <b>Synthesis of <math>A_2Se_2C_2</math></b> | <b>S2</b>  |
| 1.1      | Synthesis in liquid ammonia . . . . .       | S2         |
| 1.2      | Synthesis by heating of $ASeC_2H$ . . . . . | S2         |
| <b>2</b> | <b>Structural characterisation</b>          | <b>S2</b>  |
| 2.1      | Pair Distribution Functions . . . . .       | S2         |
| 2.2      | Additional Information . . . . .            | S3         |
| 2.3      | $Na_2Se_2C_2$ . . . . .                     | S3         |
| 2.4      | $K_2Se_2C_2$ . . . . .                      | S4         |
| 2.5      | $Rb_2Se_2C_2$ . . . . .                     | S5         |
| 2.6      | $Cs_2Se_2C_2$ . . . . .                     | S6         |
| 2.7      | Comparison with $PA/mmm$ cell . . . . .     | S8         |
| <b>3</b> | <b>SEM</b>                                  | <b>S10</b> |
| <b>4</b> | <b>DFT calculations</b>                     | <b>S10</b> |
| 4.1      | Solid State DFT calculations . . . . .      | S10        |
| 4.2      | Gas phase DFT calculations . . . . .        | S11        |
| <b>5</b> | <b>Vibrational spectroscopy</b>             | <b>S12</b> |
|          | <b>References</b>                           | <b>S12</b> |

# 1 Synthesis of $A_2Se_2C_2$

**Warning** These compounds are highly sensitive to impact. They may react explosively with moisture, releasing acetylene. Therefore, we strongly advise handling only small quantities of these compounds at a time.

## 1.1 Synthesis in liquid ammonia

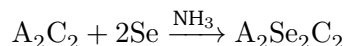

$A_2C_2$  and two equivalents of grey Se (quantities in Tab. S1) were transferred into a Schlenk tube under argon atmosphere (glovebox). Approx. 30 ml dry  $NH_3$  was condensed into the Schlenk tube on the vacuum line. For all alkali metals, this resulted in orange solutions that were stirred in a dry ice/isopropanol bath at  $-78^\circ C$  for 1 h. During this time, the selenium dissolved completely. After the reaction period,  $NH_3$  was evaporated at room temperature and afterwards evacuated under dynamic vacuum for 30 min. The product was obtained in the form of a brown, polycrystalline powder.

**Table S1** Reaction quantities for the synthesis of  $A_2Se_2C_2$  in liquid ammonia.

|               | $A_2C_2$      |                 |     | Se            |                 |     |
|---------------|---------------|-----------------|-----|---------------|-----------------|-----|
|               | <i>m</i> (mg) | <i>n</i> (mmol) | Eq. | <i>m</i> (mg) | <i>n</i> (mmol) | Eq. |
| $Na_2Se_2C_2$ | 100.7         | 1.439           | 1.0 | 227.1         | 2.876           | 2.0 |
| $K_2Se_2C_2$  | 99.8          | 0.976           | 1.0 | 154.5         | 1.956           | 2.0 |
| $Rb_2Se_2C_2$ | 100.1         | 0.513           | 1.0 | 81.5          | 1.032           | 2.0 |
| $Cs_2Se_2C_2$ | 100.3         | 0.346           | 1.0 | 55.0          | 0.700           | 2.0 |

## 1.2 Synthesis by heating of $ASeC_2H$

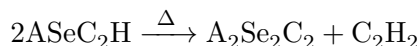

An unspecified amount of  $ASeC_2H$  was transferred into a small glass vial under argon atmosphere. The glass vial was transferred into a Schlenk tube. The Schlenk tube was heated at a rate of  $3^\circ C \text{ min}^{-1}$  under dynamic vacuum to  $200^\circ C$ . The temperature was held for 1 h. The product was obtained as a brown, polycrystalline powder.

# 2 Structural characterisation

## 2.1 Pair Distribution Functions

All equations regarding the PDF or structure functions are given in the PDFFIT formalism.<sup>1</sup> This means that

$$G(r) = 4\pi r [\rho(r) - \rho_0] \quad (1)$$

$$= \frac{2}{\pi} \int_0^\infty F(Q) \sin(Qr) dQ \quad (2)$$

$$= \frac{2}{\pi} \int_0^\infty Q[S(Q) - 1] \sin(Qr) dQ \quad (3)$$

with  $\rho(r)$  being the microscopic pair density,  $\rho_0$  the average number density,  $Q$  the magnitude of the scattering vector and  $F(Q)$  the reduced structure function.<sup>2,3</sup>  $S(Q)$  is the structure function, defined as

$$S(Q) = \frac{I_c(Q) - \langle f(Q)^2 \rangle + \langle f(Q) \rangle^2}{\langle f(Q) \rangle^2}. \quad (4)$$

$I_c(Q)$  denotes the measured coherent scattering intensity,  $f(Q)$  is the atomic scattering factor. The angle brackets indicate taking the average over all atoms in the sample.<sup>3</sup>

## 2.2 Additional Information

**Table S2** Deviation  $\delta_{\text{cube}}$  from a perfect cubic  $\text{SeA}_8$  ( $A = \text{Na-Cs}$ ) coordination, calculated using Polynator<sup>4</sup>.

|                        | $\text{Na}_2\text{Se}_2\text{C}_2$ | $\text{K}_2\text{Se}_2\text{C}_2$ | $\text{Rb}_2\text{Se}_2\text{C}_2$ | $\text{Cs}_2\text{Se}_2\text{C}_2$ |
|------------------------|------------------------------------|-----------------------------------|------------------------------------|------------------------------------|
| $\delta_{\text{cube}}$ | 4.479                              | 2.747                             | 2.355                              | 1.386                              |

## 2.3 $\text{Na}_2\text{Se}_2\text{C}_2$

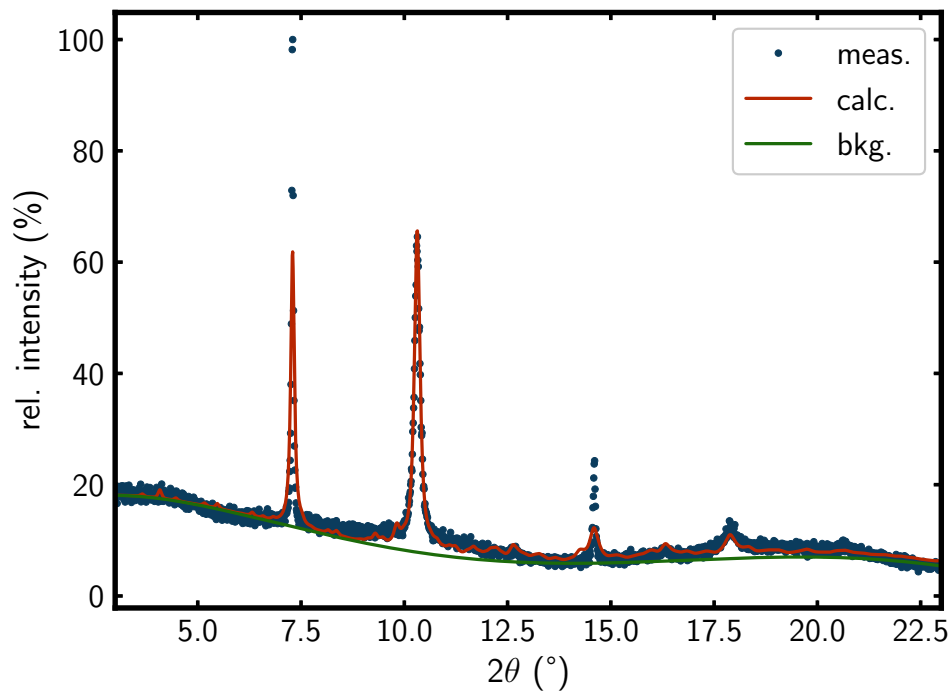

**Figure S1** Rietveld fit of  $\text{Na}_2\text{Se}_2\text{C}_2$  in a  $4 \times 4 \times 4$  supercell with disordered anions ( $\lambda = 0.496 \text{ \AA}$ ).

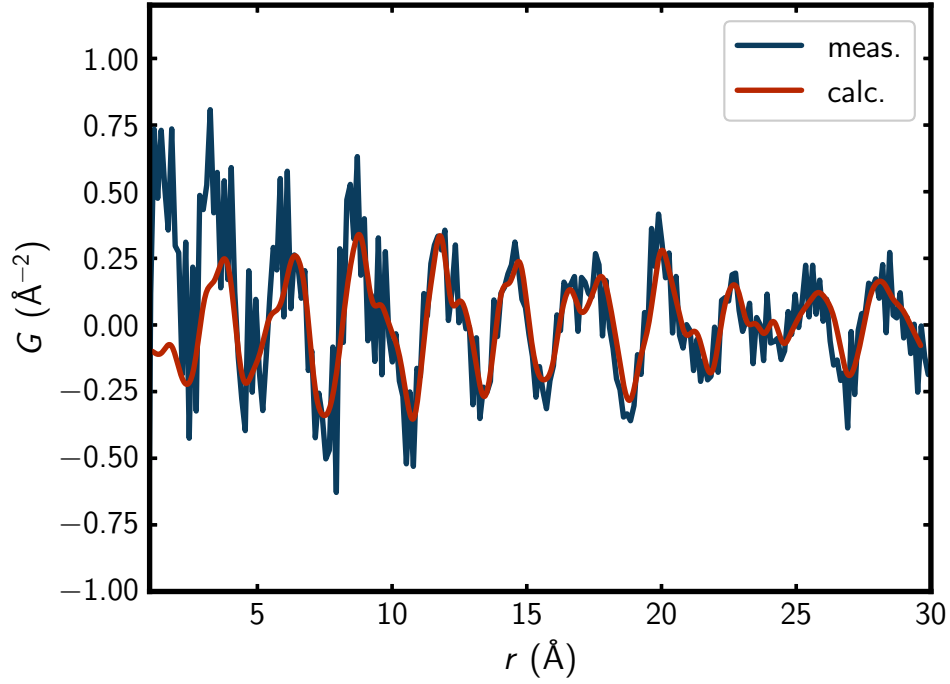

**Figure S2** PDF fit of  $\text{Na}_2\text{Se}_2\text{C}_2$  in a  $4 \times 4 \times 4$  supercell with disordered anions ( $Q_{\text{max}} = 22.9 \text{ \AA}^{-1}$ ).

**Table S3** Lattice parameters of  $\text{Na}_2\text{Se}_2\text{C}_2$  obtained from combined Rietveld and PDF fits as well as from DFT calculations.

|               | $4 \times 4 \times 4$ |            | $P4/mmm$  |            |
|---------------|-----------------------|------------|-----------|------------|
|               | refined               | calculated | refined   | calculated |
| $a$ (Å)       | 15.727(9)             | 15.536     | 3.92(3)   | 3.903      |
| $b$ (Å)       | 15.727(9)             | 15.454     | 3.92(3)   | 3.903      |
| $c$ (Å)       | 15.727(9)             | 15.507     | 7.71(7)   | 7.938      |
| $\frac{c}{a}$ | 1                     | 0.998      | 1.967(23) | 2.034      |
| $\alpha$ (°)  | 90                    | 90.014     | 90        | 90         |
| $\beta$ (°)   | 90                    | 89.578     | 90        | 90         |
| $\gamma$ (°)  | 90                    | 91.059     | 90        | 90         |

## 2.4 $\text{K}_2\text{Se}_2\text{C}_2$

**Table S4** Lattice parameters of  $\text{K}_2\text{Se}_2\text{C}_2$  obtained from combined Rietveld and PDF fits as well as from DFT calculations.

|               | $4 \times 4 \times 4$ |            | $P4/mmm$ |            |
|---------------|-----------------------|------------|----------|------------|
|               | refined               | calculated | refined  | calculated |
| $a$ (Å)       | 16.926(4)             | 16.461     | 4.223(3) | 4.246      |
| $b$ (Å)       | 16.926(4)             | 16.929     | 4.223(3) | 4.246      |
| $c$ (Å)       | 16.926(4)             | 16.556     | 8.449(7) | 8.150      |
| $\frac{c}{a}$ | 1                     | 1.006      | 2.001(2) | 1.919      |
| $\alpha$ (°)  | 90                    | 89.675     | 90       | 90         |
| $\beta$ (°)   | 90                    | 89.936     | 90       | 90         |
| $\gamma$ (°)  | 90                    | 89.979     | 90       | 90         |

## 2.5 $\text{Rb}_2\text{Se}_2\text{C}_2$

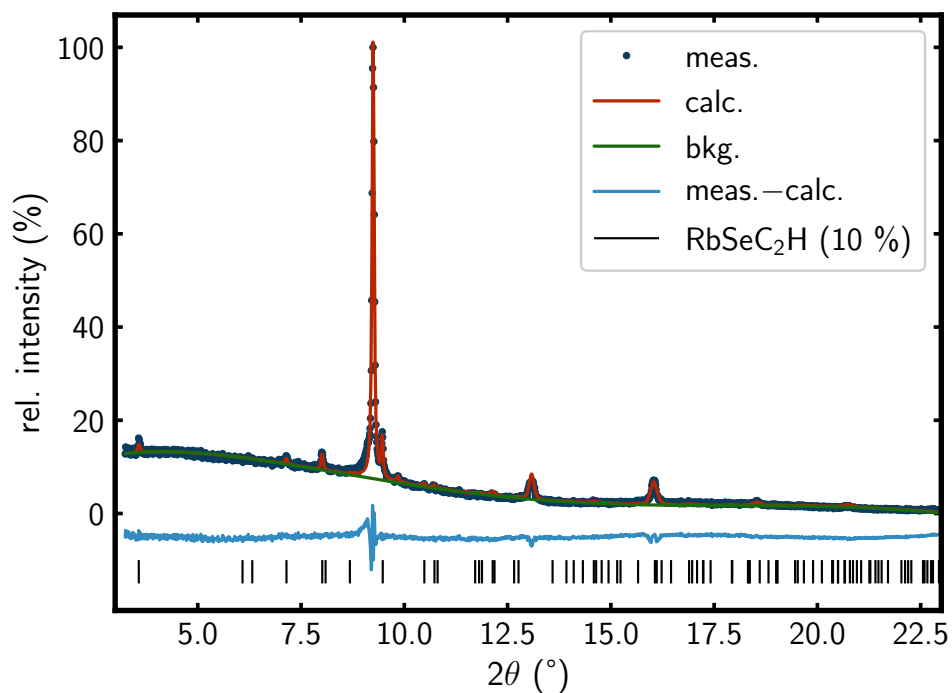

**Figure S3** Rietveld fit of  $\text{Rb}_2\text{Se}_2\text{C}_2$  in a  $4 \times 4 \times 4$  supercell with disordered anions ( $\lambda = 0.496 \text{ \AA}$ ). The amount of the impurity  $\text{RbSeC}_2\text{H}^5$  was fitted to 10%, marked with vertical bars.

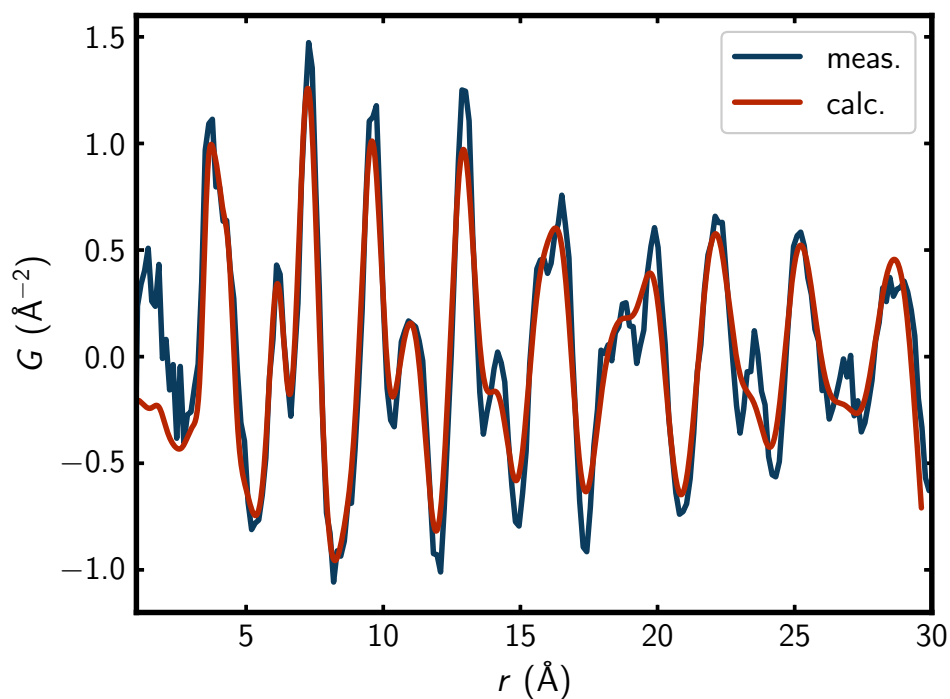

**Figure S4** PDF fit of  $\text{Rb}_2\text{Se}_2\text{C}_2$  in a  $4 \times 4 \times 4$  supercell with disordered anions ( $Q_{\text{max}} = 22.9 \text{ \AA}^{-1}$ ).

**Table S5** Lattice parameters of  $\text{Rb}_2\text{Se}_2\text{C}_2$  obtained from combined Rietveld and PDF fits as well as from DFT calculations.

|               | $4 \times 4 \times 4$ |            | $P4/mmm$  |            |
|---------------|-----------------------|------------|-----------|------------|
|               | refined               | calculated | refined   | calculated |
| $a$ (Å)       | 17.391(4)             | 17.136     | 4.378(8)  | 4.421      |
| $b$ (Å)       | 17.391(4)             | 17.226     | 4.378(8)  | 4.421      |
| $c$ (Å)       | 17.391(4)             | 17.311     | 8.805(17) | 8.261      |
| $\frac{c}{a}$ | 1                     | 1.010      | 2.011(5)  | 1.869      |
| $\alpha$ (°)  | 90                    | 90.040     | 90        | 90         |
| $\beta$ (°)   | 90                    | 90.222     | 90        | 90         |
| $\gamma$ (°)  | 90                    | 90.054     | 90        | 90         |

## 2.6 $\text{Cs}_2\text{Se}_2\text{C}_2$

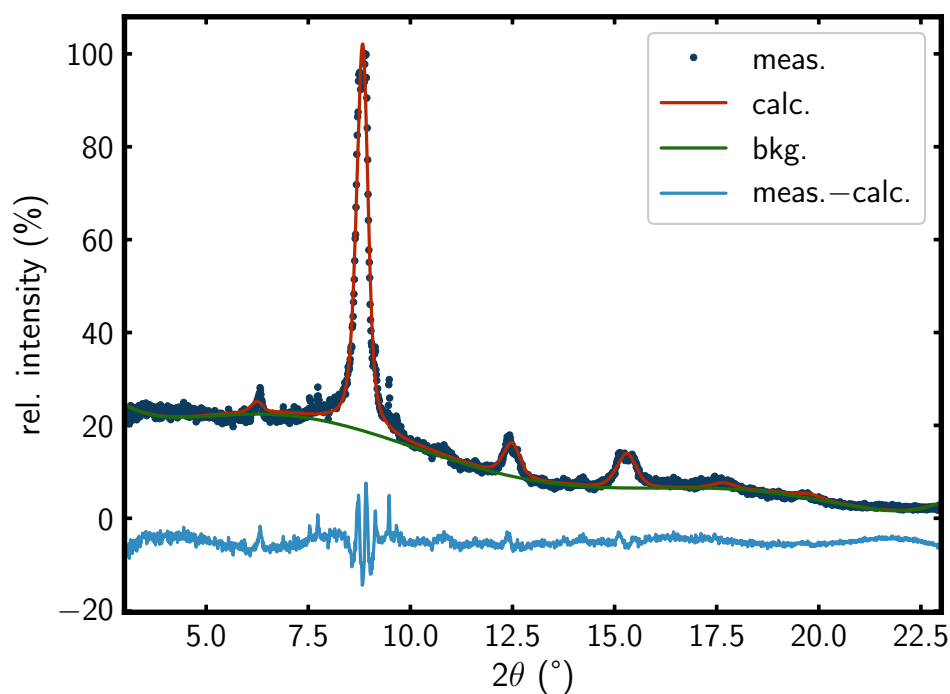

**Figure S5** Rietveld fit of  $\text{Cs}_2\text{Se}_2\text{C}_2$  in a  $4 \times 4 \times 4$  supercell with disordered anions ( $\lambda = 0.496$  Å).

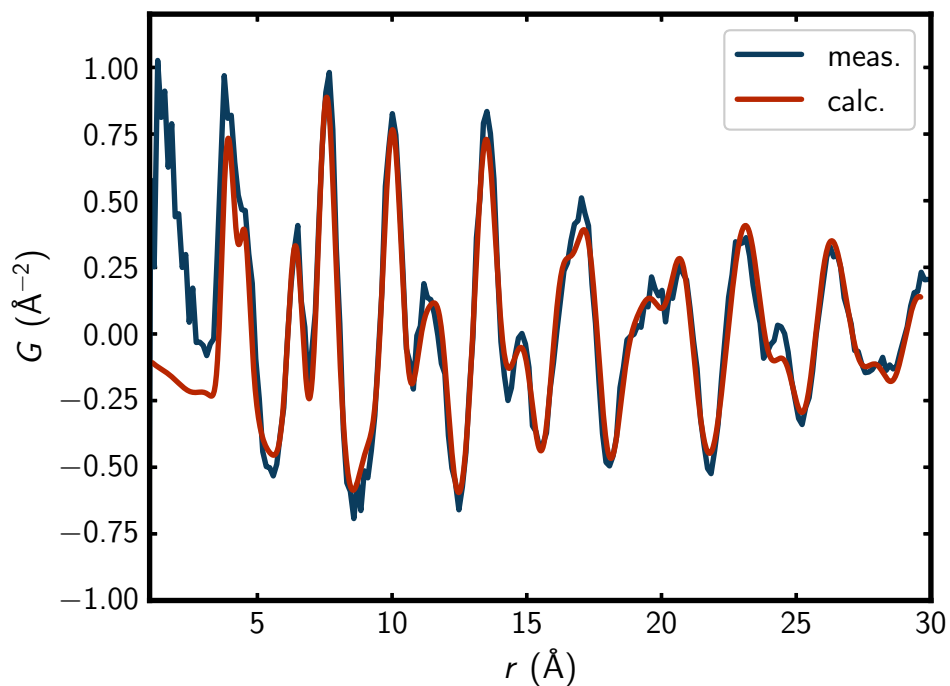

**Figure S6** PDF fit of  $\text{Cs}_2\text{Se}_2\text{C}_2$  in a  $4 \times 4 \times 4$  supercell with disordered anions ( $Q_{\text{max}} = 22.9 \text{ \AA}^{-1}$ ).

**Table S6** Lattice parameters of  $\text{Cs}_2\text{Se}_2\text{C}_2$  obtained from combined Rietveld and PDF fits as well as from DFT calculations.

|               | $4 \times 4 \times 4$ |            | $P4/mmm$  |            |
|---------------|-----------------------|------------|-----------|------------|
|               | refined               | calculated | refined   | calculated |
| $a$ (Å)       | 18.211(12)            | 18.136     | 4.599(16) | 4.622      |
| $b$ (Å)       | 18.211(12)            | 17.789     | 4.599(16) | 4.622      |
| $c$ (Å)       | 18.211(12)            | 17.807     | 8.92(3)   | 8.397      |
| $\frac{c}{a}$ | 1                     | 0.982      | 1.940(9)  | 1.817      |
| $\alpha$ (°)  | 90                    | 89.926     | 90        | 90         |
| $\beta$ (°)   | 90                    | 89.873     | 90        | 90         |
| $\gamma$ (°)  | 90                    | 89.895     | 90        | 90         |

## 2.7 Comparison with $P4/mmm$ cell

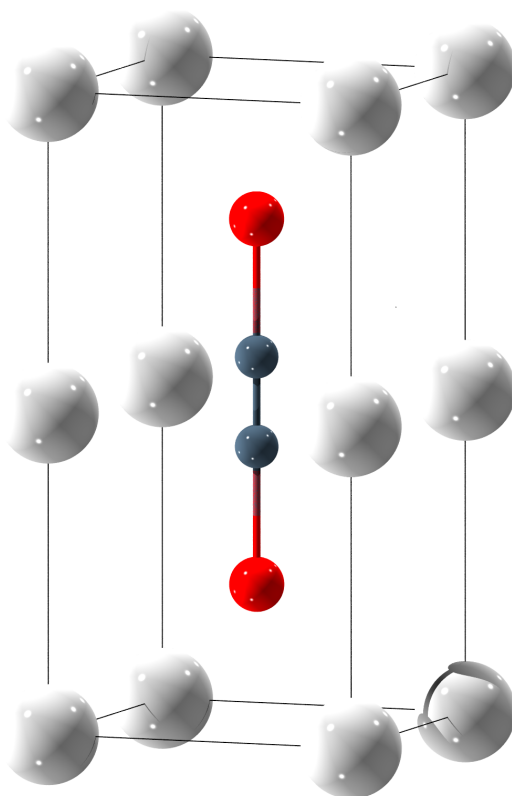

**Figure S7** Potential unit cell of  $K_2Se_2C_2$  with anions oriented along the  $c$  axis, crystallising in space group type  $P4/mmm$ .

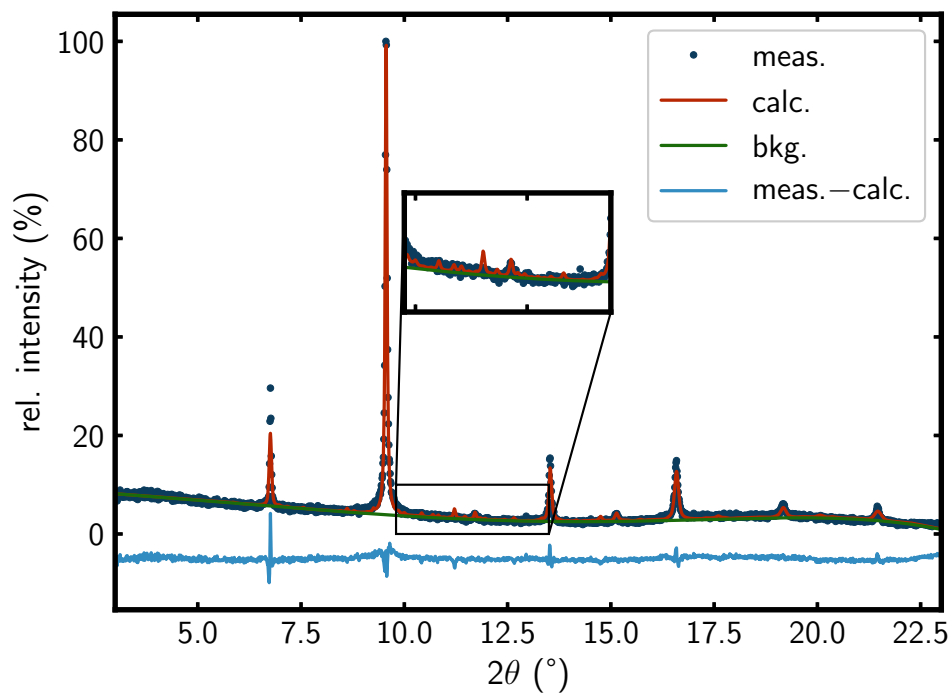

**Figure S8** Rietveld fit of  $\text{K}_2\text{Se}_2\text{C}_2$  in a  $4 \times 4 \times 4$  supercell with disordered anions ( $\lambda = 0.496 \text{ \AA}$ ) with an inset from  $9.8^\circ$  to  $13.5^\circ$ .

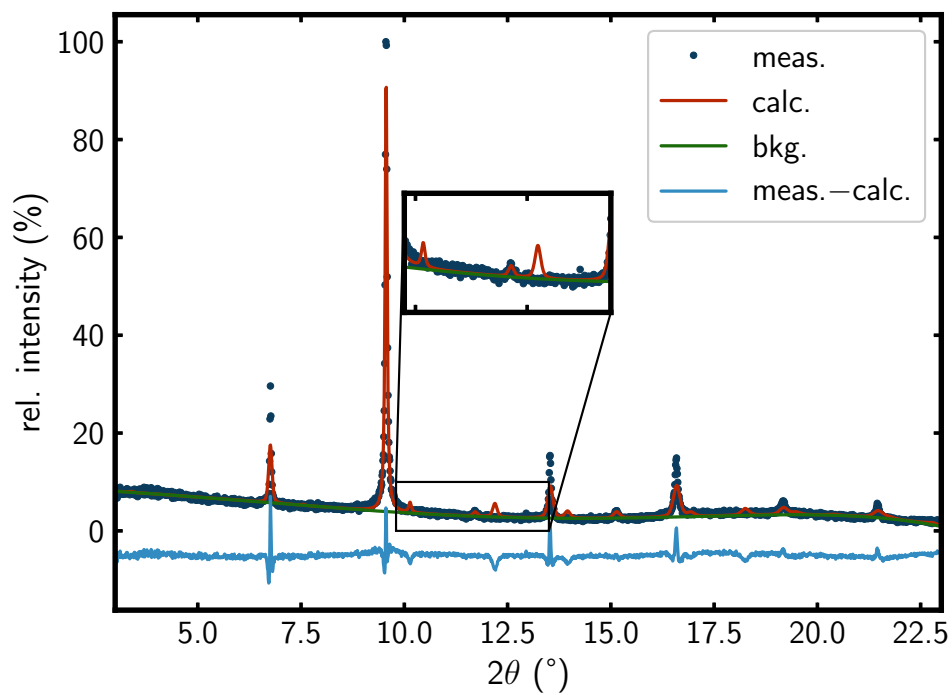

**Figure S9** Rietveld fit of  $\text{K}_2\text{Se}_2\text{C}_2$  in space group  $P4/mmm$  with ordered anions ( $\lambda = 0.496 \text{ \AA}$ ) with an inset from  $9.8^\circ$  to  $13.5^\circ$ .

### 3 SEM

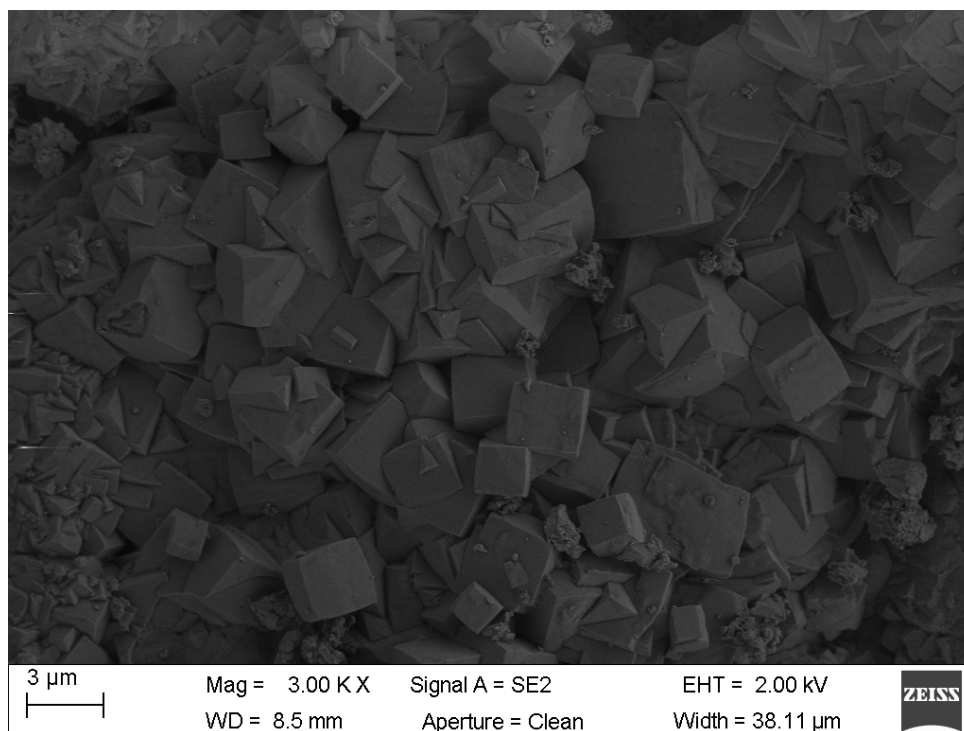

Figure S10 SEM image of  $\text{K}_2\text{Se}_2\text{C}_2$ .

## 4 DFT calculations

### 4.1 Solid State DFT calculations

All solid state DFT calculations were carried out using QUANTUM ESPRESSO 7.3 and its PWscf code.<sup>6,7</sup> Total energies and geometries were obtained using the PBEsol exchange functional<sup>8</sup>, pseudopotentials from the SSSP PBEsol Precision v1.3.0 library<sup>9-13</sup> and D3 correction<sup>14</sup>.

Table S7 Converged parameters for DFT calculations of  $4 \times 4 \times 4$  supercells and cells with  $P4/mmm$  symmetry of  $\text{A}_2\text{Se}_2\text{C}_2$ .

|                                     | $\text{Na}_2\text{Se}_2\text{C}_2$ | $\text{K}_2\text{Se}_2\text{C}_2$ | $\text{Rb}_2\text{Se}_2\text{C}_2$ | $\text{Cs}_2\text{Se}_2\text{C}_2$ |
|-------------------------------------|------------------------------------|-----------------------------------|------------------------------------|------------------------------------|
| $k$ -grid ( $4 \times 4 \times 4$ ) | $3 \times 3 \times 3$              | $3 \times 3 \times 3$             | $3 \times 3 \times 3$              | $3 \times 3 \times 3$              |
| $k$ -grid ( $P4/mmm$ )              | $14 \times 14 \times 7$            | $10 \times 10 \times 5$           | $12 \times 12 \times 6$            | $12 \times 12 \times 6$            |
| $E_{\text{cut},W}$ (Ry)             | 150                                | 100                               | 60                                 | 80                                 |
| $E_{\text{cut},\rho}$ (Ry)          | 1200                               | 800                               | 480                                | 640                                |

For all structures, at first the size of the  $k$ -mesh was converged with respect to total energy and stress. Afterwards, the kinetic energy cutoff for wavefunctions ( $E_{\text{cut},W}$ ) was converged as well. The kinetic energy cutoff for charge density and potential ( $E_{\text{cut},\rho}$ ) was fixed at  $8E_{\text{cut},W}$ . All converged values are given in Table S7.

For calculations of formation enthalpies, the total energies of the corresponding elements were subtracted. Crystal structure data of the elements was taken from the ICSD<sup>15-21</sup>.

Spectroscopic data was calculated using the PHonon code and Density-Functional Perturbation Theory (DFPT).<sup>22</sup> As the long-range disorder was only expected to have a minor effect,<sup>23</sup> these calculations were carried out on a smaller cell for ease of use. Calculations used the local

density approximation (LDA)<sup>24</sup> functional with norm-conserving ONCVSP v0.4.1 pseudopotentials<sup>25</sup> as this approach was demonstrated to perform well for DFPT calculations.<sup>26</sup>

## 4.2 Gas phase DFT calculations

All calculations were carried out using ORCA 6.1.0 and its built-in functions.<sup>27–32</sup> All energies and geometries were obtained by DFT calculations using the B3LYP functional<sup>33–36</sup> with D4 correction<sup>37–39</sup> and ma-def2-QZVPP<sup>40,41</sup> basis sets.

Starting geometries were created in Avogadro 2<sup>42,43</sup> and preliminary optimised using Open Babel<sup>44</sup>. Afterwards, the geometry was optimised on the described DFT level using the TIGHTOPT command. To compute the non-resonant Raman spectra, the polarisability was computed analytically, derivatives of the polarisability were calculated numerically.

## 5 Vibrational spectroscopy

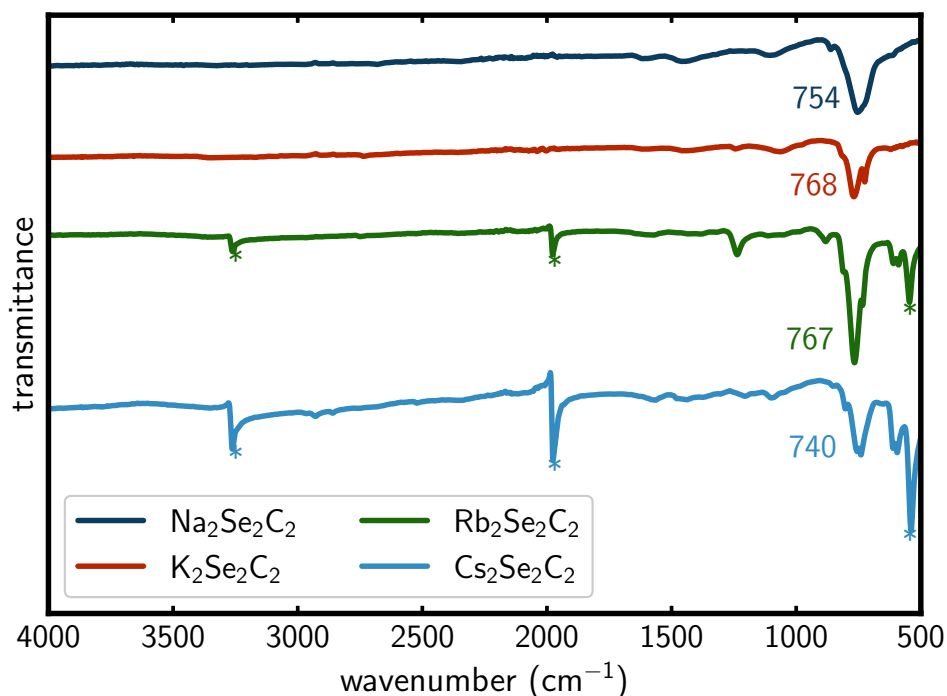

**Figure S11** IR spectra of the A<sub>2</sub>Se<sub>2</sub>C<sub>2</sub> (A = Na–Cs) compounds. Wavenumbers of the Se–C stretching vibration are given. Modes that can be attributed to RbSeC<sub>2</sub>H or CsSeC<sub>2</sub>H,<sup>5</sup> respectively, are marked with a \*.

## References

- [1] D. A. Keen, *J. Appl. Crystallogr.*, 2001, **34**, 172–177.
- [2] T. Proffen and S. J. L. Billinge, *J. Appl. Crystallogr.*, 1999, **32**, 572–575.
- [3] P. Juhás, T. Davis, C. L. Farrow and S. J. L. Billinge, *J. Appl. Crystallogr.*, 2013, **46**, 560–566.
- [4] L. Link and R. Niewa, *J. Appl. Crystallogr.*, 2023, **56**, 1855–1864.
- [5] M. Hetzert, M. Werker and U. Ruschewitz, *Angew. Chem. Int. Ed.*, 2018, **57**, 16475–16479.

- [6] P. Giannozzi, O. Andreussi, T. Brumme, O. Bunau, M. B. Nardelli, M. Calandra, R. Car, C. Cavazzoni, D. Ceresoli, M. Cococcioni, N. Colonna, I. Carnimeo, A. D. Corso, S. de Gironcoli, P. Delugas, R. A. D. Jr, A. Ferretti, A. Floris, G. Fratesi, G. Fugallo, R. Gebauer, U. Gerstmann, F. Giustino, T. Gorni, J. Jia, M. Kawamura, H.-Y. Ko, A. Kokalj, E. Küçükbenli, M. Lazzeri, M. Marsili, N. Marzari, F. Mauri, N. L. Nguyen, H.-V. Nguyen, A. O. de-la Roza, L. Paulatto, S. Poncé, D. Rocca, R. Sabatini, B. Santra, M. Schlipf, A. P. Seitsonen, A. Smogunov, I. Timrov, T. Thonhauser, P. Umari, N. Vast, X. Wu and S. Baroni, *J. Phys. Condens. Matter*, 2017, **29**, 465901.
- [7] P. Giannozzi, S. Baroni, N. Bonini, M. Calandra, R. Car, C. Cavazzoni, D. Ceresoli, G. L. Chiarotti, M. Cococcioni, I. Dabo, A. Dal Corso, S. de Gironcoli, S. Fabris, G. Fratesi, R. Gebauer, U. Gerstmann, C. Gougoussis, A. Kokalj, M. Lazzeri, L. Martin-Samos, N. Marzari, F. Mauri, R. Mazzarello, S. Paolini, A. Pasquarello, L. Paulatto, C. Sbraccia, S. Scandolo, G. Sclauzero, A. P. Seitsonen, A. Smogunov, P. Umari and R. M. Wentzcovitch, *J. Phys. Condens. Matter*, 2009, **21**, 395502.
- [8] J. P. Perdew, A. Ruzsinszky, G. I. Csonka, O. A. Vydrov, G. E. Scuseria, L. A. Constantin, X. Zhou and K. Burke, *Phys. Rev. Lett.*, 2008, **100**, 136406.
- [9] G. Prandini, A. Marrazzo, I. E. Castelli, N. Mounet and N. Marzari, *npj Comput. Mater.*, 2018, **4**, 72.
- [10] A. Dal Corso, *Comput. Mater. Sci.*, 2014, **95**, 337–350.
- [11] M. Schlipf and F. Gygi, *Comput. Phys. Commun.*, 2015, **196**, 36–44.
- [12] M. van Setten, M. Giantomassi, E. Bousquet, M. Verstraete, D. Hamann, X. Gonze and G.-M. Rignanese, *Comput. Phys. Commun.*, 2018, **226**, 39–54.
- [13] K. F. Garrity, J. W. Bennett, K. M. Rabe and D. Vanderbilt, *Comput. Mater. Sci.*, 2014, **81**, 446–452.
- [14] S. Grimme, J. Antony, S. Ehrlich and H. Krieg, *J. Chem. Phys.*, 2010, **132**, 154104.
- [15] D. Zagorac, H. Müller, S. Ruehl, J. Zagorac and S. Rehme, *J. Appl. Crystallogr.*, 2019, **52**, 918–925.
- [16] A. Ø. Drejer, M. S. Pedersen, M. Johansen and D. B. Ravnsbæk, *ACS Appl. Energy Mater.*, 2023, **6**, 4909–4921.
- [17] R. Keller, W. B. Holzapfel and H. Schulz, *Phys. Rev. B*, 1977, **16**, 4404–4412.
- [18] F. A. Kanda, R. M. Stevens and D. V. Keller, *J. Phys. Chem.*, 1965, **69**, 3867–3872.
- [19] L.-G. Liu, *J. Phys. Chem. Solids*, 1986, **47**, 1067–1072.
- [20] F. M. Kelly and W. B. Pearson, *Can. J. Phys.*, 1955, **33**, 17–74.
- [21] C. E. Weir, G. J. Piermarini and S. Block, *J. Chem. Phys.*, 1971, **54**, 2768–2770.
- [22] S. Baroni, S. de Gironcoli, A. Dal Corso and P. Giannozzi, *Rev. Mod. Phys.*, 2001, **73**, 515–562.
- [23] G. Ulian and G. Valdrè, *Sci. Rep.*, 2023, **13**, 2725.
- [24] P. Hohenberg and W. Kohn, *Phys. Rev.*, 1964, **136**, B864–B871.
- [25] D. R. Hamann, *Phys. Rev. B*, 2013, **88**, 085117.

- [26] L. He, F. Liu, G. Hautier, M. J. T. Oliveira, M. A. L. Marques, F. D. Vila, J. J. Rehr, G.-M. Rignanesi and A. Zhou, *Phys. Rev. B*, 2014, **89**, 064305.
- [27] F. Neese, *WIREs Comput. Molec. Sci.*, 2025, **15**, e70019.
- [28] F. Neese, *J. Comput. Chem.*, 2003, **24**, 1740–1747.
- [29] F. Neese, F. Wennmohs, A. Hansen and U. Becker, *Chem. Phys.*, 2009, **356**, 98–109.
- [30] B. Helmich-Paris, B. de Souza, F. Neese and R. Izsák, *J. Chem. Phys.*, 2021, **155**, 104109.
- [31] F. Neese, *J. Comput. Chem.*, 2022, **44**, 381–396.
- [32] L. Wittmann, I. Gordiy, M. Friede, B. Helmich-Paris, S. Grimme, A. Hansen and M. Bursch, *Phys. Chem. Chem. Phys.*, 2024, **26**, 21379–21394.
- [33] A. D. Becke, *J. Chem. Phys.*, 1993, **98**, 5648–5652.
- [34] C. Lee, W. Yang and R. G. Parr, *Phys. Rev. B*, 1988, **37**, 785–789.
- [35] S. H. Vosko, L. Wilk and M. Nusair, *Can. J. Phys.*, 1980, **58**, 1200–1211.
- [36] P. J. Stephens, F. J. Devlin, C. F. Chabalowski and M. J. Frisch, *J. Phys. Chem.*, 1994, **98**, 11623–11627.
- [37] E. Caldeweyher, C. Bannwarth and S. Grimme, *J. Chem. Phys.*, 2017, **147**, 034112.
- [38] E. Caldeweyher, S. Ehlert, A. Hansen, H. Neugebauer, S. Spicher, C. Bannwarth and S. Grimme, *J. Chem. Phys.*, 2019, **150**, 154122.
- [39] E. Caldeweyher, J.-M. Mewes, S. Ehlert and S. Grimme, *Phys. Chem. Chem. Phys.*, 2020, **22**, 8499–8512.
- [40] F. Weigend and R. Ahlrichs, *Phys. Chem. Chem. Phys.*, 2005, **7**, 3297.
- [41] J. Zheng, X. Xu and D. G. Truhlar, *Theor. Chem. Acc.*, 2010, **128**, 295–305.
- [42] M. D. Hanwell, D. E. Curtis, D. C. Lonie, T. Vandermeersch, E. Zurek and G. R. Hutchison, *J. Cheminf.*, 2012, **4**, 17.
- [43] K. Sharkey, M. D. Hanwell, C. Harris and A. Vacanti, *Avogadro 2 and Open Chemistry*, Online, 2013, <https://www.kitware.com/avogadro-2-and-open-chemistry/>, last visited 07.01.2026.
- [44] N. M. O’Boyle, M. Banck, C. A. James, C. Morley, T. Vandermeersch and G. R. Hutchison, *J. Cheminf.*, 2011, **3**, 33.
